# Supplementary material for: Chemical Compositions and Antioxidant Activities of Thirty-Seven Typical Pomegranates Grown in China
Source: Hindawi journal article supplement (doi:10.1155/2023/9915770), 2023-12-05

# Chemical compositions and antioxidant activities of thirty-seven typical pomegranates grown in China

Wenhao Zheng,<sup>b#</sup> Boyan Gao,<sup>b#</sup> Hanshu Zhu,<sup>b</sup> Lin Zhu,<sup>b</sup> Zhenhua Lu,<sup>c</sup> Lina Chen<sup>c</sup>,  
Mo Li,<sup>d</sup> Yinghua Luo,<sup>a\*</sup> Liangli (Lucy) Yu<sup>e</sup>

<sup>a</sup> College of Food Science and Nutritional Engineering, National Engineering Research Center for Fruit and Vegetable Processing, Key Laboratory of Fruit and Vegetable Processing Ministry of Agriculture, Engineering Research Centre for Fruit and Vegetable Processing, Ministry of Education, China Agricultural University, Beijing, China

<sup>b</sup> Institute of Food and Nutraceutical Science, School of Agriculture & Biology, Shanghai Jiao Tong University, Shanghai 200240, China

<sup>c</sup> Zhengzhou Fruit Research Institute, Chinese Academy of Agricultural Sciences, Zhengzhou 450009, China

<sup>d</sup> R & D Division, Integrated management, Beijing 100048, China

<sup>e</sup> Department of Nutrition and Food Science, University of Maryland, College Park, MD 20742, United States

# These authors contributed equally to this manuscript.

\* Contact Information of the Corresponding Author:

Yinghua Luo, Ph. D

Email: [luoyinghua@cau.edu.cn](mailto:luoyinghua@cau.edu.cn)

**Table S1.** Sample information about thirty-seven pomegranate samples

| <b>No.</b> | <b>Type of cultivar</b>           | <b>Original growing locations</b> |
|------------|-----------------------------------|-----------------------------------|
| 1          | local cultivar                    | Anhui, China                      |
| 2          | local cultivar                    | Anhui, China                      |
| 3          | local cultivar                    | Anhui, China                      |
| 4          | local cultivar                    | Anhui, China                      |
| 5          | local cultivar                    | Anhui, China                      |
| 6          | local cultivar                    | Anhui, China                      |
| 7          | local cultivar                    | Anhui, China                      |
| 8          | local cultivar                    | Anhui, China                      |
| 9          | local cultivar                    | Fujian, China                     |
| 10         | local cultivar                    | Shandong, China                   |
| 11         | local cultivar                    | Shandong, China                   |
| 12         | local cultivar                    | Shandong, China                   |
| 13         | local cultivar                    | Shandong, China                   |
| 14         | local cultivar                    | Shandong, China                   |
| 15         | local cultivar                    | Shandong, China                   |
| 16         | local cultivar                    | Shandong, China                   |
| 17         | local cultivar                    | Shandong, China                   |
| 18         | local cultivar                    | Shaanxi, China                    |
| 19         | local cultivar                    | Sichuan, China                    |
| 20         | local cultivar                    | Yunnan, China                     |
| 21         | local cultivar                    | Yunnan, China                     |
| 22         | local cultivar                    | unknown origin                    |
| 23         | registered novel cultivar         |                                   |
| 24         | registered novel cultivar         |                                   |
| 25         | registered novel cultivar         |                                   |
| 26         | registered novel cultivar         |                                   |
| 27         | imported cultivar                 | United States                     |
| 28         | imported cultivar                 | Tunisia                           |
| 29         | imported cultivar                 | Turkmenistan                      |
| 30         | imported cultivar                 | Israel                            |
| 31         | imported cultivar                 | Italy                             |
| 32         | imported cultivar                 | Italy                             |
| 33         | imported cultivar                 | Italy                             |
| 34         | un-registered developing cultivar |                                   |
| 35         | un-registered developing cultivar |                                   |
| 36         | un-registered developing cultivar |                                   |
| 37         | un-registered developing cultivar |                                   |

**Figure S1.** Representative UPLC-Q TOF MS chromatograms of pomegranate A) peel and B) juice sample.

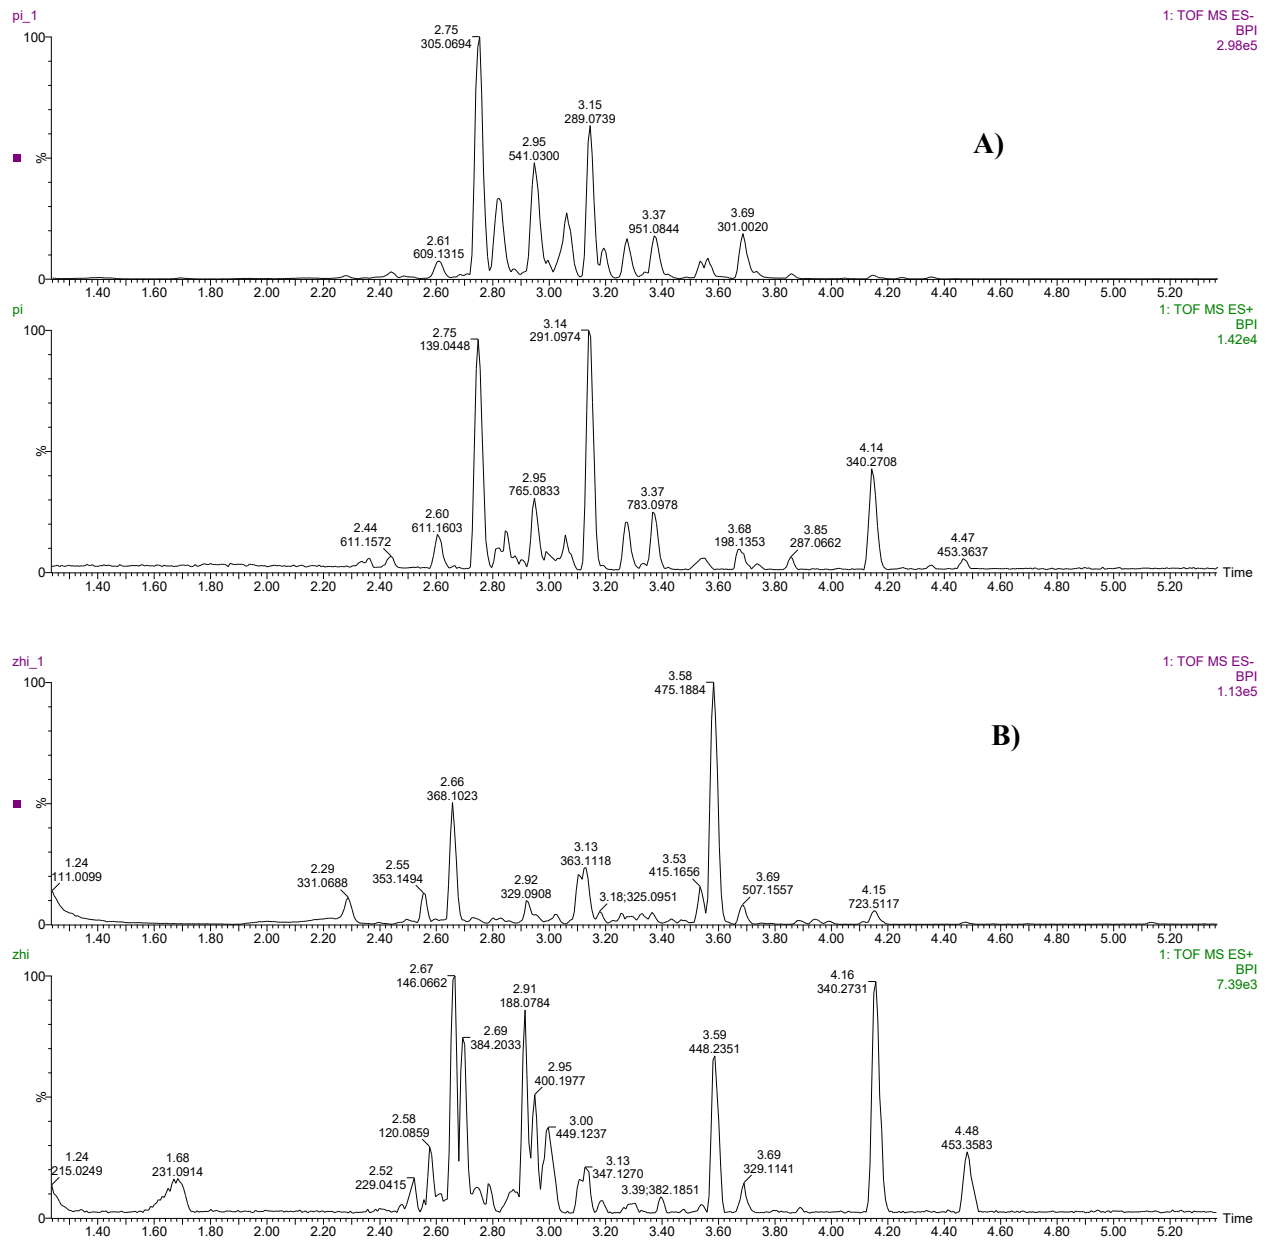

Supplement: f1 [file 9915770.f1.pdf]
